## Index to Volume IX.

### Articles.

|                                                                                                                                                                                            |     |
|--------------------------------------------------------------------------------------------------------------------------------------------------------------------------------------------|-----|
| Awerinzew, S. Über die Verteilung von <i>Mallotus villosus</i> im Barentsmeer .....                                                                                                        | 79  |
| Buch, Kurt, und Charley Gustafsson. Der Salz- und Temperaturfehler von Thymolblau .....                                                                                                    | 173 |
| Bückmann, A. Die Hauptlinien der internationalen Schollenuntersuchungen der letzten Jahre .....                                                                                            | 309 |
| de Buen, Fernando. Estudios raciales basados en el número de vértebras en la sardina, <i>Sardina pilchardus</i> (Walb.) .....                                                              | 339 |
| Butcher, R. W. Zostera. Report on the Present Condition of Eel Grass on the Coasts of England, based on a Survey during August to October 1933 .....                                       | 49  |
| Dixon, Boris. The Age and Growth of Salmon Caught in the Polish Baltic in the Years 1931—1933 .....                                                                                        | 66  |
| Edser, T., and S. H. Crouchen. Observations on the Accuracy of the Collection of Fishery Statistics .....                                                                                  | 83  |
| Fraser-Brunner, A. An Arrangement of Nets for Capturing Small Oceanic Fishes .....                                                                                                         | 46  |
| Graham, Michael. The North Sea Cod .....                                                                                                                                                   | 159 |
| Kramp, P. L. An Exceptional Occurrence of <i>Rhizostoma octopus</i> and <i>Chrysaora hysoscella</i> in the Danish Waters in 1933 .....                                                     | 211 |
| Lewis, H. Mabel. The Physical and Chemical Oceanography of the Irish Sea. A Bibliography .....                                                                                             | 87  |
| Lissner, H. On Races of Herrings .....                                                                                                                                                     | 346 |
| Mohr, Erna W. Bibliographie der Alters- und Wachstums-Bestimmung bei Fischen. III. Nachträge und Fortsetzung.....                                                                          | 377 |
| Nesbit, Robert A. A Convenient Method for Preparing Celluloid Impressions of Fish Scales .....                                                                                             | 373 |
| Van Oosten, John, H. J. Deason and Frank W. Jobes. A Microprojection Machine Designed for the Study of Fish Scales.....                                                                    | 241 |
| Raitt, D. S. A Preliminary Account of the Sandeels of Scottish Waters                                                                                                                      | 365 |
| Rallier du Baty, R. Montagnes et Vallées Sous-Marines du Golfe de Gascogne .....                                                                                                           | 181 |
| Redeke, H. C. On the Occurrence of two Pelagic Copepods, <i>Acartia bifilosa</i> and <i>Acartia tonsa</i> , in the Brackish Waters of the Netherlands                                      | 39  |
| Robinson, Rex J., and Henry E. Wirth. Report on the Free Ammonia, Albuminoid Nitrogen and Organic Nitrogen in the Waters of the Puget Sound Area, during the Summers of 1931 and 1932..... | 15  |
| Robinson, Rex J., and Henry E. Wirth. Free Ammonia, Albuminoid Nitrogen, and Organic Nitrogen in the Waters of the Pacific Ocean off the Coasts of Washington and Vancouver Island.....    | 187 |
| Savage, R. E., and W. C. Hodgson. Lunar Influence on the East Anglian Herring Fishery .....                                                                                                | 223 |
| Thomas, Bertram D., with Thomas G. Thompson and Clinton L. Utterback. The Electrical Conductivity of Sea Water .....                                                                       | 28  |
| Utterback, C. L., Thomas G. Thompson and Bertram D. Thomas. Refractivity-Chlorinity-Temperature Relationships of Ocean Waters..                                                            | 35  |
| Utterback, C. L., and Wilhelm Jorgensen. Absorption of Daylight in the North Pacific Ocean .....                                                                                           | 197 |

## Reviews.

|                                                                                                                                                                                                                                                              |     |
|--------------------------------------------------------------------------------------------------------------------------------------------------------------------------------------------------------------------------------------------------------------|-----|
| <b>Bajarunass, E.</b> Zur Frage über die Bestimmung des Chlorkoeffizienten im Wasser des Schwarzen Meeres. Reviewed by A. L. Behning..                                                                                                                       | 138 |
| <b>Benecke, W.</b> Bakteriologie des Meeres. Reviewed by S. A. Waksman                                                                                                                                                                                       | 133 |
| <b>Bond, R. M.</b> A Contribution to the Study of the Natural Food-Cycle in Aquatic Environments, with particular consideration of micro-organisms and dissolved organic matter. Reviewed by C. M. Yonge                                                     | 134 |
| <b>Brandt, K., and J. Reibisch.</b> Der Stoffhaushalt im Meere. Reviewed by J. Reibisch .....                                                                                                                                                                | 131 |
| <b>Broch, H.</b> Über einige geographisch interessanten Fundstellen von Alcyonarien und Hydrokorallen im nördlichen Stillen Ozean. Reviewed by A. L. Behning .....                                                                                           | 136 |
| <b>Brujewicz, S. W., and N. P. Karpova.</b> Abhängigkeit des pH von der Temperatur in Pufferlösungen. Reviewed by K. Buch.....                                                                                                                               | 99  |
| <b>Buch, K.</b> Hydrografisk-kemiska studier uti Petsamofjorden jämte angränsande delar av Barentshavet. Reviewed by H. Wattenberg                                                                                                                           | 100 |
| <b>Buchanan-Wollaston, H. J.</b> Inshore Trawl Fisheries of Dorset and Devon. Report on Researches carried out between 1924 and 1929 from Poole, Dorset, and Beer, Devon, with Recommendations bearing on Protective Legislation. Reviewed by G. Gilson..... | 278 |
| <b>Cooper, L. H. N.</b> Chemical Constituents of Biological Importance in the English Channel. Pt. III. June—December, 1932. Phosphate, Silicate, Nitrite, Hydrogen-Ion Concentration, with a Comparison with Wind Records. Reviewed by H. Wattenberg.....   | 266 |
| <b>Dannevig, Alf.</b> On the Age and Growth of the Cod ( <i>Gadus callarias</i> L.) from the Norwegian Skagerrack Coast. Reviewed by M. Graham                                                                                                               | 125 |
| <b>le Danois, E.</b> Les transgressions océaniques. Reviewed by John B. Tait .....                                                                                                                                                                           | 399 |
| <b>Deacon, G. E. R.</b> A general account of the hydrology of the South Atlantic Ocean. Reviewed by G. Böhnecke .....                                                                                                                                        | 398 |
| <b>Eggvin, J.</b> Vestfjorden. Reviewed by Michael Graham .....                                                                                                                                                                                              | 418 |
| <b>Ekman, V. W.</b> Studien zur Dynamik der Meeresströmungen. Reviewed by H. Thorade .....                                                                                                                                                                   | 108 |
| <b>Fage, L.</b> Pêches planctoniques à la lumière, effectuées à Banyuls-sur-Mer et à Concarneau. III. Crustacés. Reviewed by A. C. Gardiner                                                                                                                  | 416 |
| <b>Ford, E.</b> An Account of the Herring Investigations conducted at Plymouth during the Years from 1924—1933. Reviewed by W. Schnakenbeck .....                                                                                                            | 274 |
| <b>Freundler, M. P. et Mme M. Guaisnet-Pilaud.</b> Sur l'eau normale méditerranéenne. Reviewed by Bruno Schulz .....                                                                                                                                         | 101 |
| <b>Gaarder, T.</b> Untersuchungen über Produktions- und Lebensbedingungen in norwegischen Austern-Pollen. Reviewed by R. Kändler                                                                                                                             | 112 |
| <b>Gaarder, T. und R. Spärck.</b> Hydrographisch-biochemische Untersuchungen in norwegischen Austern-Pollen. Reviewed by R. Kändler .....                                                                                                                    | 109 |
| <b>Gibbons, S. G.</b> A Study of the Biology of <i>Calanus finmarchicus</i> in the North-Western North Sea. Reviewed by E. Hentschel.....                                                                                                                    | 267 |
| <b>Gurjanowa, Eu. F.</b> Contribution to the Isopoda fauna of the Pacific Ocean. Reviewed by A. L. Behning.....                                                                                                                                              | 136 |
| <b>Hart, T. J.</b> On the Phytoplankton of the South-West Atlantic and the Bellingshausen Sea, 1929—31. Reviewed by E. Hentschel .....                                                                                                                       | 409 |
| <b>Harvey, H. W.</b> On the rate of diatom growth. Reviewed by S. M. Marshall .....                                                                                                                                                                          | 114 |
| <b>Havinga, B.</b> Austern- und Muschelkultur. Reviewed by H. P. Sherwood .....                                                                                                                                                                              | 286 |
| <b>Hecht, F.</b> Der Verbleib der organischen Substanz der Tiere bei meerischer Einbettung. Reviewed by O. Pratzje .....                                                                                                                                     | 271 |
| <b>Hentschel, E.</b> Untersuchungen über das Kleinplankton an den Küsten von Island. Reviewed by M. V. Lebour .....                                                                                                                                          | 115 |

|                                                                                                                                                                                                                                                              |     |
|--------------------------------------------------------------------------------------------------------------------------------------------------------------------------------------------------------------------------------------------------------------|-----|
| <b>Hjort, J. and Collaborators.</b> Essays on Population. Reviewed by H. J. Buchanan-Wollaston .....                                                                                                                                                         | 119 |
| <b>Iljin, B. S.</b> Biocoenose des halistatischen Gebiets des Schwarzen Meeres. Reviewed by A. L. Behning .....                                                                                                                                              | 137 |
| <b>Iversen, T.</b> Some Observations on Cod in Northern Waters. Preliminary Report. Reviewed by Michael Graham .....                                                                                                                                         | 418 |
| <b>Jagudina, S. I.</b> Dynamik des Fischfanges am Aralsee in den Jahren 1929 bis 1931. Reviewed by A. L. Behning .....                                                                                                                                       | 136 |
| <b>Jensen, A. J. C.</b> Periodic Fluctuations in the Size of Various Stocks of Fish and their Causes. Reviewed by A. Bückmann .....                                                                                                                          | 280 |
| <b>Jorgensen, O. M.</b> On the Marine Cladocera from the Northumbrian Plankton. Reviewed by R. S. Wimpenny .....                                                                                                                                             | 268 |
| <b>Kalle, K.</b> Phosphat und Gesamtposphor in Beziehung zu Temperatur, Salzgehalt und Plankton an der Oberfläche der isländischen Küstengewässer. Reviewed by L. H. N. Cooper .....                                                                         | 99  |
| <b>Kalle, K.</b> Meereskundliche chemische Untersuchungen mit Hilfe des Zeiss'schen Pulfrich-Photometers. III. Mitteilung. Methodische Untersuchung der Phosphatgehaltsbestimmung. Reviewed by L. H. N. Cooper .....                                         | 404 |
| <b>Klem, A.</b> Contributions to the study of the oils of marine crustacea. I. The oils of <i>Meganyctiphanes norvegica</i> M. Sars and <i>Calanus finmarchicus</i> Gunn. Reviewed by R. S. Wimpenny .....                                                   | 269 |
| <b>Klevenhusen, W.</b> Die Bevölkerung des Südatlantischen Ozeans mit Corycaeen. Reviewed by G. P. Farran .....                                                                                                                                              | 116 |
| <b>Knipowitsch, N. M.</b> Hydrologische Untersuchungen im Aowschen Meere. Reviewed by A. L. Behning .....                                                                                                                                                    | 138 |
| <b>Krebs, E. and M. Osadchih.</b> The Organic Phosphorus in the Sea. Reviewed by H. Wattenberg .....                                                                                                                                                         | 265 |
| <b>Kuckuck, P.</b> Der Strandwanderer. Die wichtigsten Strandpflanzen, Meeresalgen und Seetiere der Nord- und Ostsee. Reviewed by E. S. Russell .....                                                                                                        | 152 |
| <b>Losina-Losinsky, L. K.</b> Die Pantopoden der östlichen Meere der USSR. Reviewed by A. L. Behning .....                                                                                                                                                   | 135 |
| <b>Lüders, K.</b> Sediment und Strömung. Reviewed by J. N. Carruthers .....                                                                                                                                                                                  | 405 |
| <b>Lüders, K.</b> Unmittelbare Sandwanderungsmessung auf dem Meeresboden. Reviewed by J. N. Carruthers .....                                                                                                                                                 | 405 |
| <b>Markun, M. I.</b> Die Aralsee-Barbe, ihre Systematik und Biologie. Reviewed by A. L. Behning .....                                                                                                                                                        | 136 |
| <b>Marshall, S. M.</b> On the Biology of <i>Calanus finmarchicus</i> . II. Seasonal Variations in the Size of <i>Calanus finmarchicus</i> in the Clyde Sea-Area. Reviewed by A. C. Gardiner .....                                                            | 117 |
| <b>Meyer, Karl.</b> Die geographische Verbreitung der tripyleen Radiolarien des Südatlantischen Ozeans. Reviewed by H. E. Bargmann .....                                                                                                                     | 412 |
| <b>Meyer, P. F.</b> Ein Beitrag zur Eiablage der Nordseekrabbe ( <i>Granat Crangon vulgaris</i> Fabr. Reviewed by B. HAVINGA .....                                                                                                                           | 425 |
| <b>Ministerio dell'Agricoltura e delle Foreste.</b> La Pesca nei Mari e nelle Acque Interne d'Italia. Reviewed by A. Creswell .....                                                                                                                          | 419 |
| <b>Moore, H. B.</b> Faecal pellets from marine deposits. Reviewed by A. Hagmeier .....                                                                                                                                                                       | 271 |
| <b>Möller, L.</b> Methodische Untersuchungen und Neubestimmungen der Konstanten des Meerwassers. Reviewed by J. P. Jacobsen .....                                                                                                                            | 262 |
| <b>Newfoundland Fishery Research Commission.</b> Annual Report for 1952. Reviewed by M. Graham .....                                                                                                                                                         | 124 |
| <b>Nicholls, A. G.</b> On the Biology of <i>Calanus finmarchicus</i> . I. Reproduction and Seasonal Distribution in the Clyde Sea-Area during 1952. III. Vertical Distribution and Diurnal Migration in the Clyde Sea Area. Reviewed by A. C. Gardiner ..... | 117 |
| <b>Nomitsu, Takaharu.</b> A Theory of the Rising Stage of Drift Current in the Ocean. I. The Case of No Bottom-Current; II. The Case of No Bottom-Friction. Reviewed by E. Palmén .....                                                                      | 106 |

|                                                                                                                                                                                                                                                                                                    |     |
|----------------------------------------------------------------------------------------------------------------------------------------------------------------------------------------------------------------------------------------------------------------------------------------------------|-----|
| Nomitsu, Takaharu. On the Development of the Slope Current and the Barometric Current in the Ocean. I. The Case of No Bottom-Current. Reviewed by E. Palmén .....                                                                                                                                  | 107 |
| Nomitsu, Takaharu. On the Density Current in the Ocean. I. The Case of No Bottom-Current. Reviewed by E. Palmén .....                                                                                                                                                                              | 107 |
| Nomitsu, T. On the Density Current in the Ocean. II. Reviewed by J. E. Fjeldstad .....                                                                                                                                                                                                             | 405 |
| Nomitsu, T. and T. Takegami. On the Density Current in the Ocean. III. Reviewed by J. E. Fjeldstad .....                                                                                                                                                                                           | 405 |
| Nomitsu, T. and T. Takegami. A Theory of the Rising Stage of Drift Current in the Ocean. III. Reviewed by J. E. Fjeldstad .....                                                                                                                                                                    | 402 |
| Nomitsu, T. and T. Takegami. On the Development of the Slope Current and the Barometric Current in the Ocean. II. Reviewed by J. E. Fjeldstad .....                                                                                                                                                | 402 |
| Norman, J. R. A Systematic Monograph of the Flatfishes (Heterosomata). Vol. I. Psettididae, Bothidae, Pleuronectidae. Reviewed by W. Schnakenbeck .....                                                                                                                                            | 426 |
| Okada, M. and K. Miyosi. Experimental Studies of the Water Movement in Coastal Regions of the Sea. I. Tidal Oscillations in Sagami Bay. Reviewed by R. H. Corkan .....                                                                                                                             | 407 |
| Orton, J. H. Observations and experiments on sex-change in the European oyster ( <i>O. edulis</i> ). Part III. On the fate of unspawned ova. Part IV. On the change from male to female. Reviewed by R. Spärck .....                                                                               | 424 |
| Parr, A. E. A Geographic Ecological Analysis of the Seasonal Changes in Temperature Conditions in Shallow Water along the Atlantic Coast of the United States. Reviewed by C. Iselin .....                                                                                                         | 105 |
| Pentelow, F. T. K., B. A. Southgate and R. Bassindale. I. Relation between the Size, Age and Time of Migration of Salmon and Sea Trout Smolts in the River Tees. II. The Proportion of the Sexes and the Food of Smolts of Salmon and Sea Trout in the Tees Estuary. Reviewed by R. Southern ..... | 285 |
| Raitt, D. S. The Fecundity of the Haddock. Reviewed by C. F. Hickling .....                                                                                                                                                                                                                        | 128 |
| Retowski, L. Beobachtungen an marinen Kleingewässern der Murmanküste. Reviewed by A. L. Behning .....                                                                                                                                                                                              | 157 |
| van Riel, P. M. Surface temperature in the north-western part of the Atlantic Ocean. Reviewed by C. Iselin .....                                                                                                                                                                                   | 259 |
| Rollefsen, G. Skreiens alder. Reviewed by Michael Graham ..                                                                                                                                                                                                                                        | 418 |
| Rollefsen, G. The Otoliths of the Cod. Reviewed by M. Graham ..                                                                                                                                                                                                                                    | 127 |
| Rosby, C. G. A generalization of the theory of the mixing length with applications to atmospheric and oceanic turbulence. Reviewed by H. Ertel .....                                                                                                                                               | 401 |
| Russell, E. S. The Behaviour of Animals: An Introduction to its Study. Reviewed by G. M. Spooner .....                                                                                                                                                                                             | 429 |
| Schulz, B. Bericht über die Fortschritte der Ozeanographie (1929—32). Reviewed by J. R. Lumby .....                                                                                                                                                                                                | 262 |
| Schumacher, A. Ozeanographie. Reviewed by D. J. Matthews ..                                                                                                                                                                                                                                        | 255 |
| Sinova, E. S. Les algues de Kamtschatka. Reviewed by A. L. Behning .....                                                                                                                                                                                                                           | 135 |
| Southern, R. The Food and Growth of Brown Trout. Reviewed by F. T. K. Pentelow .....                                                                                                                                                                                                               | 286 |
| Spiess, F. Das Forschungsschiff und seine Reise. Reviewed by D. J. Matthews .....                                                                                                                                                                                                                  | 256 |
| Spooner, G. M. Observations on the Reactions of Marine Plankton to Light. Reviewed by G. Fraenkel .....                                                                                                                                                                                            | 408 |
| Stenij, S. E. Zur Theorie der Wasserschwingungen in einem begrenzten Meeresbecken mit besonderer Berücksichtigung des Einflusses vom Luftdruck. Reviewed by H. Thorade .....                                                                                                                       | 260 |

|                                                                                                                                                                                                                                                          |     |
|----------------------------------------------------------------------------------------------------------------------------------------------------------------------------------------------------------------------------------------------------------|-----|
| Stephen, A. C. Studies on the Scottish Marine Fauna: The Natural Faunistic Divisions of the North Sea as shown by the Quantitative Distribution of the Molluscs. Reviewed by H. Blegvad .....                                                            | 414 |
| Stephen, A. C. Studies on the Scottish Marine Fauna: Quantitative Distribution of the Echinoderms and the Natural Faunistic Divisions of the North Sea. Reviewed by H. Blegvad .....                                                                     | 414 |
| Steven, G. A. Observations on the Growth of the Claspers and Cloaca in <i>Raja clavata</i> Linnaeus. Reviewed by J. R. Norman .....                                                                                                                      | 423 |
| Sund, O. Torskebestanden. Reviewed by Michael Graham ..                                                                                                                                                                                                  | 418 |
| Sverdrup, H. U. On the vertical circulation in the Ocean due to the action of the wind with application to conditions within the Antarctic circumpolar current. Reviewed by G. Böhnecke ....                                                             | 397 |
| Sverdrup, H. U. and F. M. Soule. Scientific Results of the "Nautilus" Expedition 1931, under the command of Capt. Sir Hubert Wilkins. Part I—III. Reviewed by A. Schumacher .....                                                                        | 257 |
| Tesch, J. J. und J. de Veen. Die Niederländische Seefischerei. Reviewed by J. T. Jenkins .....                                                                                                                                                           | 129 |
| Thiemann, K. Das Plankton der Flussmündungen. Reviewed by M. V. Lebour .....                                                                                                                                                                             | 411 |
| Thorade, H. Methoden zum Studium der Meeresströmungen. Reviewed by H. U. Sverdrup .....                                                                                                                                                                  | 261 |
| Thursby-Pelham, D. E. Report on the English Plaice Investigations during the Years 1926 to 1930. Reviewed by Aage J. C. Jensen ..                                                                                                                        | 277 |
| Uhl, G. F. Zur Frage über die Navigationsklassifikation der Küstenmeerboden. Reviewed by A. L. Behning .....                                                                                                                                             | 137 |
| Wattenberg, H. Das chemische Beobachtungsmaterial und seine Gewinnung. Kalziumkarbonat- und Kohlensäuregehalt des Meerwassers. Reviewed by L. H. N. Cooper .....                                                                                         | 263 |
| Willer, A. Untersuchungen über das Wachstum von Fischen. V. Untersuchungen über Wachstumsbeeinflussung bei Bachforellenbrut durch Änderungen des Sauerstoffgehaltes des Brutwassers. Reviewed by F. T. K. Pentelow .....                                 | 150 |
| Wimpenny, R. S. Variations in North Sea Plankton 1925—24. Reviewed by E. Hentschel .....                                                                                                                                                                 | 266 |
| Wright, F. S. Report of Investigations into the past and present condition of the Natural Oyster Beds of South Wales including a brief account of experimental work undertaken towards the improvement of the oyster fishery. Reviewed by J. H. Orton .. | 273 |
| Wüst, Georg. Das Bodenwasser und die Gliederung der Atlantischen Tiefsee. Reviewed by V. W. Ekman .....                                                                                                                                                  | 102 |

### Notes and Correspondence.

|                                                                 |     |
|-----------------------------------------------------------------|-----|
| Obituary Notice:—                                               |     |
| Wilhelm Walter Otto Mielck (1878—1935) by A. Hagmeier .....     | 5   |
| Note:—                                                          |     |
| Organization of Fishery Research in the U.S.S.R. B. Ilyin ..... | 392 |
| Correspondence:—                                                |     |
| Plymouth Sagitta; F. S. Russell .....                           | 95  |
| Migration of Fishes; W. J. M. Menzies and Louis Roule .....     | 94  |
| Letter to the Editor by Per Ottestad .....                      | 249 |
| Letter to the Editor by H. J. Buchanan-Wollaston .....          | 394 |

### Current Bibliography.

|                                                                                              |                  |
|----------------------------------------------------------------------------------------------|------------------|
| Current Bibliography prepared by the Editor with the assistance of Miss Thursby-Pelham ..... | 140, 289 and 452 |
|----------------------------------------------------------------------------------------------|------------------|
